1 **Engineering single pan-specific ubiquibodies for targeted degradation of all forms**  
2 **of endogenous ERK protein kinase**

3  
4 Erin A. Stephens<sup>1</sup>, Morgan B. Ludwicki<sup>2</sup>, Bunyarit Meksiriporn<sup>3</sup>, Mingji Li<sup>2</sup>, Tianzheng Ye<sup>2</sup>,  
5 Connor Monticello<sup>3</sup>, Katherine J. Forsythe<sup>4</sup> Lutz Kummer<sup>5</sup>, Andreas Plückthun<sup>5</sup> and  
6 Matthew P. DeLisa<sup>1,2,3\*</sup>

7  
8 <sup>1</sup>Biochemistry, Molecular and Cell Biology, Cornell University, Ithaca, NY 14853 USA

9 <sup>2</sup>Robert F. Smith School of Chemical and Biomolecular Engineering, Cornell University,  
10 Ithaca, NY 14853 USA

11 <sup>3</sup>Nancy E. and Peter C. Meinig School of Biomedical Engineering, Cornell University,  
12 Ithaca, New York 14853 USA

13 <sup>4</sup>College of Arts and Sciences, Cornell University, Ithaca, NY 14853 USA

14 <sup>5</sup>Department of Biochemistry, University of Zürich, 8057 Zürich, Switzerland

15  
16 \*To whom correspondence should be addressed: Matthew P. DeLisa, Robert F. Smith  
17 School of Chemical and Biomolecular Engineering, Cornell University, Ithaca, NY 14853  
18 USA Phone: 607-254-8560; Fax: 607-255-9166; Email: md255@cornell.edu

19  
20  
21  
22  
23  
24  
25  
26  
27  
28  
29  
30  
31

1 **Abstract**

2 Ubiquibodies (uAbs) are a customizable proteome editing technology that utilizes E3  
3 ubiquitin ligases genetically fused to synthetic binding proteins to steer otherwise stable  
4 proteins of interest (POIs) to the proteasome for degradation. The ability of engineered  
5 uAbs to accelerate the turnover of exogenous or endogenous POIs in a posttranslational  
6 manner offers a simple yet robust tool for dissecting diverse functional properties of  
7 cellular proteins as well as for expanding the druggable proteome to include tumorigenic  
8 protein families that have yet-to-be successfully drugged by conventional inhibitors. Here,  
9 we describe the engineering of uAbs comprised of a highly modular human E3 ubiquitin  
10 ligase, human carboxyl terminus of Hsc70-interacting protein (CHIP), tethered to different  
11 designed ankyrin repeat proteins (DARPs) that bind to nonphosphorylated (inactive)  
12 and/or doubly phosphorylated (active) forms of extracellular signal-regulated kinase 1 and  
13 2 (ERK1/2). Two of the resulting uAbs were found to be global ERK degraders, pan-  
14 specifically capturing all endogenous ERK1/2 protein forms and redirecting them to the  
15 proteasome for degradation in different cell lines, including MCF7 breast cancer cells.  
16 Taken together, these results demonstrate how the substrate specificity of an E3 ubiquitin  
17 ligase can be reprogrammed to generate designer uAbs against difficult-to-drug targets,  
18 enabling a modular platform for remodeling the mammalian proteome.

19  
20  
21  
22  
23  
24  
25  
26  
27  
28  
29  
30  
31

## 1 Introduction

2 Proteome editing technology represents a powerful strategy for posttranslational control  
3 of protein function based on the principle of “inhibition-by-degradation” whereby an  
4 inhibitor/degrader hijacks the cellular quality control machinery to selectively eliminate  
5 target proteins <sup>1-3</sup>. A common feature of proteome editing approaches is the ability to  
6 promote catalytic turnover of otherwise stable intracellular proteins, requiring only  
7 transient binding to virtually any site on the protein of interest (POI). This is in stark  
8 contrast to traditional occupancy-based inhibitors, which depend on a distinct binding site  
9 that affects function (*e.g.*, enzyme active site) and require relatively high concentrations  
10 to ensure sustained stoichiometric binding. For these reasons, the development of  
11 proteome editors that are capable of inducing protein degradation is gaining considerable  
12 attention for both scientific investigation of native protein function and therapeutic  
13 targeting of disease-relevant proteins, especially those that are recalcitrant to  
14 conventional pharmacological interventions and have thus been deemed difficult-to-drug  
15 <sup>4, 5</sup>.

16 The creation of customized degrader molecules typically involves precision  
17 marking of specific POIs for proteolytic removal via molecular mimicry of natural  
18 degradation processes found in eukaryotic cells. The most frequently exploited of these  
19 degradation processes is the ubiquitin-proteasome pathway (UPP), which involves the  
20 sequential activities of three enzymes – ubiquitin-activating enzyme (E1), ubiquitin-  
21 conjugating enzyme (E2), and ubiquitin ligase (E3) – that cooperate in an energy-  
22 dependent manner to covalently tag available protein lysines with a polyubiquitin chain <sup>6</sup>.  
23 While a variety of polyubiquitin chain topologies are possible, K48-linked ubiquitin serves  
24 as the canonical recognition signal for the 26S proteasome and generally leads to  
25 substrate degradation <sup>7</sup>. The fact that E3s govern substrate specificity and often exhibit  
26 remarkable plasticity has made these enzymes the component of choice in the majority  
27 of proteome editing technologies described to date. Most notable among these  
28 technologies is PROTACs (proteolysis targeting chimeras) <sup>8, 9</sup>, which are  
29 heterobifunctional small molecules that effectively bridge the E3 and the POI, forming a  
30 ternary complex that triggers target polyubiquitination and subsequent proteasomal  
31 degradation in cultured cells and mice <sup>10-14</sup>. With respect to clinical potential, two

1 PROTACs, named ARV-110 and ARV-471, targeting androgen receptor and estrogen  
2 receptor, respectively, have advanced into phase I human trials <sup>15</sup>.

3       Alongside small-molecule PROTACs are protein-based chimeras in which an E3  
4 is genetically fused to a peptide or protein with affinity for the POI. In the earliest designs,  
5 substrate targeting was achieved by leveraging naturally occurring protein interaction  
6 partners, whereby fusion of an E3 (or a component of an E3 ligase complex) to a POI's  
7 known binding partner yielded a chimera that promoted knockout of the cognate POI  
8 following expression in cultured cells <sup>16, 17</sup>. When a binding partner for a given POI is  
9 available, this approach has proven to be highly effective both *in vitro* and *in vivo*, leading  
10 to induced degradation of several different oncoprotein targets including c-Myc, ErbB,  
11 HIF- $\alpha$ , and KRAS <sup>18-21</sup>. However, this approach is limited to only those POIs for which a  
12 natural interacting partner is known.

13       Therefore, to extend this approach beyond naturally occurring protein-protein  
14 interactions, we created ubiquibodies (uAbs) by genetically fusing an E3 to a synthetic  
15 binding protein such as a single-chain antibody fragment (scFv), a designed ankyrin  
16 repeat protein (DARPin), or a fibronectin type III (FN3) monobody <sup>22</sup>. Because synthetic  
17 binders can be readily identified using methods such as phage, ribosome, and yeast  
18 display <sup>23, 24</sup> with the potential for proteome-scale coverage <sup>25</sup>, uAbs are a universally  
19 applicable technology that can be developed against virtually any intracellular POI.  
20 Indeed, by combining the flexible ubiquitin-tagging capacity of a human RING/U-box-type  
21 E3 named CHIP (carboxyl-terminus of Hsc70-interacting protein) with the programmable  
22 affinity and specificity of synthetic binding proteins, we demonstrated that uAbs efficiently  
23 redirected *Escherichia coli*  $\beta$ -galactosidase ( $\beta$ -gal) and maltose-binding protein (MBP) to  
24 the UPP for proteolytic degradation <sup>22</sup>. Importantly, neither of the POIs was a natural  
25 substrate for CHIP and the degradation that we observed did not depend on the biological  
26 function or interaction partners of the POIs. Also noteworthy is the highly modular  
27 architecture of uAbs: swapping synthetic binding proteins enables generation of new  
28 uAbs that recognize completely different POIs <sup>26-34</sup> while swapping E3 domains enables  
29 tailoring of the catalytic efficiency and/or E2 specificity <sup>27, 34</sup>. It is even possible to deplete  
30 certain protein subpopulations (*e.g.*, active/inactive, posttranslationally  
31 modified/unmodified, wild-type (wt)/mutant, *etc.*) while sparing others <sup>17, 18, 27</sup>.

1           Here, we exploited the versatility of uAbs to construct proteome editors capable of  
2 selectively removing the major isoforms of extracellular signal-regulated kinase (ERK),  
3 namely ERK1 and ERK2, which share ~85% identity in their amino-acid sequence and  
4 appear to be functionally equivalent<sup>35</sup>. Following activation by phosphorylation on  
5 tyrosine and threonine residues by upstream kinases in the mitogen-activated protein  
6 kinase (MAPK) pathway<sup>36</sup>, ERK1/2 phosphorylate numerous substrates that participate  
7 in key physiological processes that control cell proliferation, differentiation, survival, and  
8 death<sup>37, 38</sup>. We chose to focus on ERK1/2 because the MAPK pathway is the most  
9 frequently mutated signaling pathway in human cancer, making components of this  
10 cascade attractive targets for drug development<sup>36</sup>. To this end, a significant number of  
11 RAF and MEK inhibitors have been preclinically and clinically evaluated, which is in  
12 contrast to the more limited development of selective ERK1/2 inhibitors. While there are  
13 many reasons for this discrepancy<sup>36</sup>, occupancy-based inhibitors specific for ERK are  
14 very difficult to design due to the high homology between active-site pockets of ERK1/2  
15 and cyclin-dependent kinases (CDKs).

16           To address this challenge, we generated a global ERK degrader by recombining  
17 human CHIP's discrete catalytic U-box domain with a pan-specific DARPIn named EpE89  
18 that recognizes both nonphosphorylated ERK1 and ERK2 as well as the doubly  
19 phosphorylated forms, pERK1 and pERK2<sup>39</sup>. Our results demonstrated the efficacy of  
20 this engineered uAb, as well as a second design based on a pERK1/2-specific DARPIn  
21 named pE59<sup>39</sup>, in pan-selectively inducing ubiquitin-mediated degradation of all major  
22 ERK1/2 proteoforms in cultured cells. In addition, we uncovered the molecular basis for  
23 pan-specificity, which appeared to originate from an ability of the engineered uAbs to  
24 install polyubiquitin, including K-48-linked chains, on both ERK2 and pERK2.

25

## 26 **Results**

27 **Construction of a pan-specific ERK ubiquibody.** CHIP is a human U-box E3 ubiquitin  
28 ligase with three discrete domains, an N-terminal tetratricopeptide repeat (TPR) domain,  
29 a C-terminal U-box domain, and an intermediate coiled-coil linker (**Fig. 1a**)<sup>40, 41</sup>. The TPR  
30 domain of CHIP binds to the molecular chaperones Hsc70-Hsp70 and Hsp90, facilitating  
31 ubiquitination of chaperone-bound client proteins<sup>42</sup>. To convert CHIP into a pan-specific

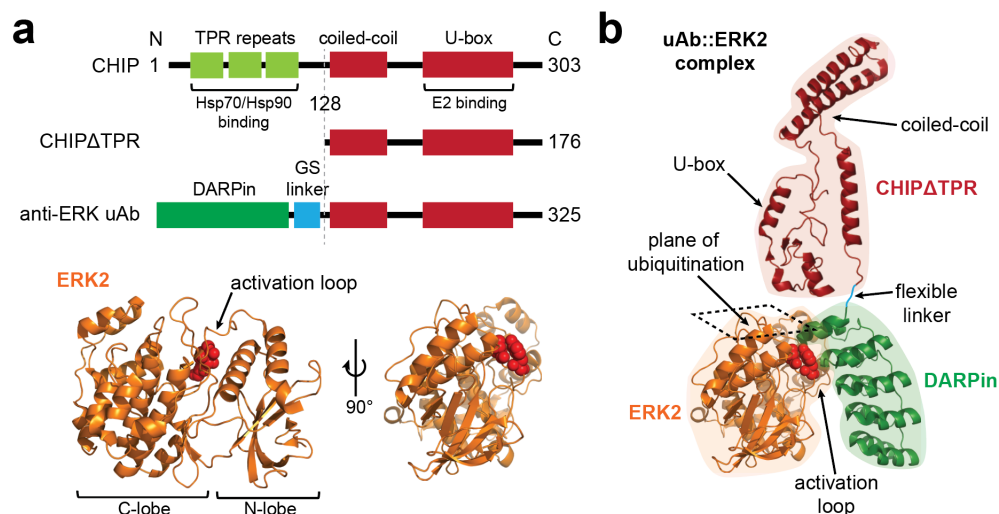

1  
 2 **Figure 1. Modular design of a pan-specific ERK degrader.** (a) The architecture of uAbs is highly  
 3 modular, involving three distinct domains: a substrate-binding domain comprised of a synthetic binding  
 4 protein (green); a flexible Gly-Ser-Gly-Ser-Gly (GS) linker (blue); and a catalytic domain comprised of the  
 5 C-terminus of human CHIP starting from residue 128 (CHIPΔTPR) (red). The synthetic binding domains  
 6 used in this study are DARPins with specificity for different ERK forms. Crystal structure of human ERK2  
 7 (orange) generated in PyMOL (PDB ID: 3ZU7). Residues T185 and Y187 (red balls) are phosphorylated  
 8 upon activation, leading to rotation of the N-lobe relative to the C-lobe. (b) Orientation of the catalytic domain  
 9 in uAb::ERK2 complex. The ubiquitination plane is in direct proximity to the theoretical position of the  
 10 catalytic domain. Schematic generated from a composite of PDB ID: 2C2L and 3ZU7 in PyMOL and  
 11 Illustrator software.

12  
 13 ERK degrader, we replaced its N-terminal TPR domain with DARPin EpE89 that  
 14 recognizes nonphosphorylated and doubly phosphorylated ERK1 and ERK2 (**Fig. 1a**)<sup>39</sup>.  
 15 For comparison purposes, we constructed two additional uAbs comprised of phospho-  
 16 isoform-specific DARPin pE59, which preferentially binds pERK1 and pERK2, and  
 17 DARPin, E40, which specifically recognizes nonphosphorylated ERK1 and ERK2. Our  
 18 uAb designs retained the flexible coiled-coiled domain of CHIP, which has been shown  
 19 to be critical for E3 dimerization<sup>40</sup>, as well as the catalytic U-box domain. A short linker  
 20 of five amino acids (Gly-Ser-Gly-Ser-Gly) was included to ensure flexibility between the  
 21 C-terminal capping helices of the DARPin and helix α7 of the N-terminally truncated CHIP  
 22 (CHIPΔTPR) (**Fig. 1a and b**). The rationally designed uAbs were expressed in the  
 23 cytoplasm of *E. coli* cells and purified by Ni-NTA affinity chromatography, resulting in  
 24 soluble titers (~30 mg protein per liter culture) that were notably higher than their unfused  
 25 DARPin counterparts (**Supplementary Fig. 1a**). This latter observation indicated that the  
 26 CHIPΔTPR domain somehow enhanced the expression of its DARPin fusion partners.  
 27 Following purification and characterization by size exclusion chromatography (SEC), the

1 uAbs were observed to elute slightly earlier than the non-aggregated portion of wild-type  
2 CHIP (**Supplementary Fig. 1b**). Since CHIP eluted at a volume expected of a dimer with  
3 a large water shell, consistent with the observation that the U-box of human CHIP  
4 functions as a homodimer<sup>40, 41</sup>, we concluded that the uAbs were similarly assembled as  
5 dimeric structures akin to their parental E3 ubiquitin ligase.

6 **Reprogramming the substrate specificity of CHIP with ERK-binding DARPins.** The  
7 extent to which CHIP's substrate specificity was switched by tethering to pan-ERK-  
8 specific EpE89 was first evaluated using a previously described affinity precipitation  
9 assay<sup>39</sup>. In this assay, lysate derived from human embryonic kidney (HEK) 293T cells, a  
10 common epithelial cell line, was incubated with purified EpE89-uAb, which was  
11 subsequently captured by Ni-NTA beads. Immunoblotting analysis revealed that EpE89-  
12 uAb was able to precipitate endogenous ERK1 and ERK2 as evidenced by the cross-  
13 reactivity of elution fractions with a phosphorylation-state independent anti-ERK antibody  
14 that recognizes all ERK isoforms including phosphorylated ones (**Supplementary Fig.**  
15 **2a**). Similar affinity precipitation was achieved with pE59-uAb, E40-uAb, and the unfused  
16 DARPins, with the behavior of the latter in agreement with Kummer *et al*<sup>39</sup>. In contrast,  
17 CHIP $\Delta$ TPR and the non-specific control Off7-uAb, a chimera between CHIP $\Delta$ TPR and  
18 the DARPIn Off7 that binds *E. coli* maltose-binding protein<sup>43</sup>, were unable to capture  
19 ERK1/2. Importantly, none of the proteins precipitated Hsp70, a native substrate of full-  
20 length CHIP<sup>42</sup>, indicating that CHIP's substrate specificity had been effectively  
21 reprogrammed by swapping the TPR domain with ERK-binding DARPins.

22 To evaluate the pan-specificity of EpE89-uAb in more detail, we performed an  
23 enzyme-linked immunosorbent assay (ELISA) using ERK2 and pERK2 as immobilized  
24 antigens. Consistent with the known binding specificity of unfused EpE89<sup>39, 44</sup>, the  
25 EpE89-uAb bound avidly to both ERK2 and pERK2. The pE59-uAb and E40-uAb  
26 constructs similarly mirrored the substrate preferences of their parental DARPins,  
27 specifically binding pERK2 and ERK2, respectively, at levels that rivaled the binding  
28 activity of pan-specific EpE89-uAb for each target (**Fig. 2a** and **Supplementary Fig. 2b**).  
29 It should be noted that while pE59-uAb and its unfused pE59 counterpart clearly preferred  
30 cognate pERK2, each bound to nonphosphorylated ERK2 at a low but reproducible level  
31 above background. A similar pattern was observed for E40-uAb and E40, with each

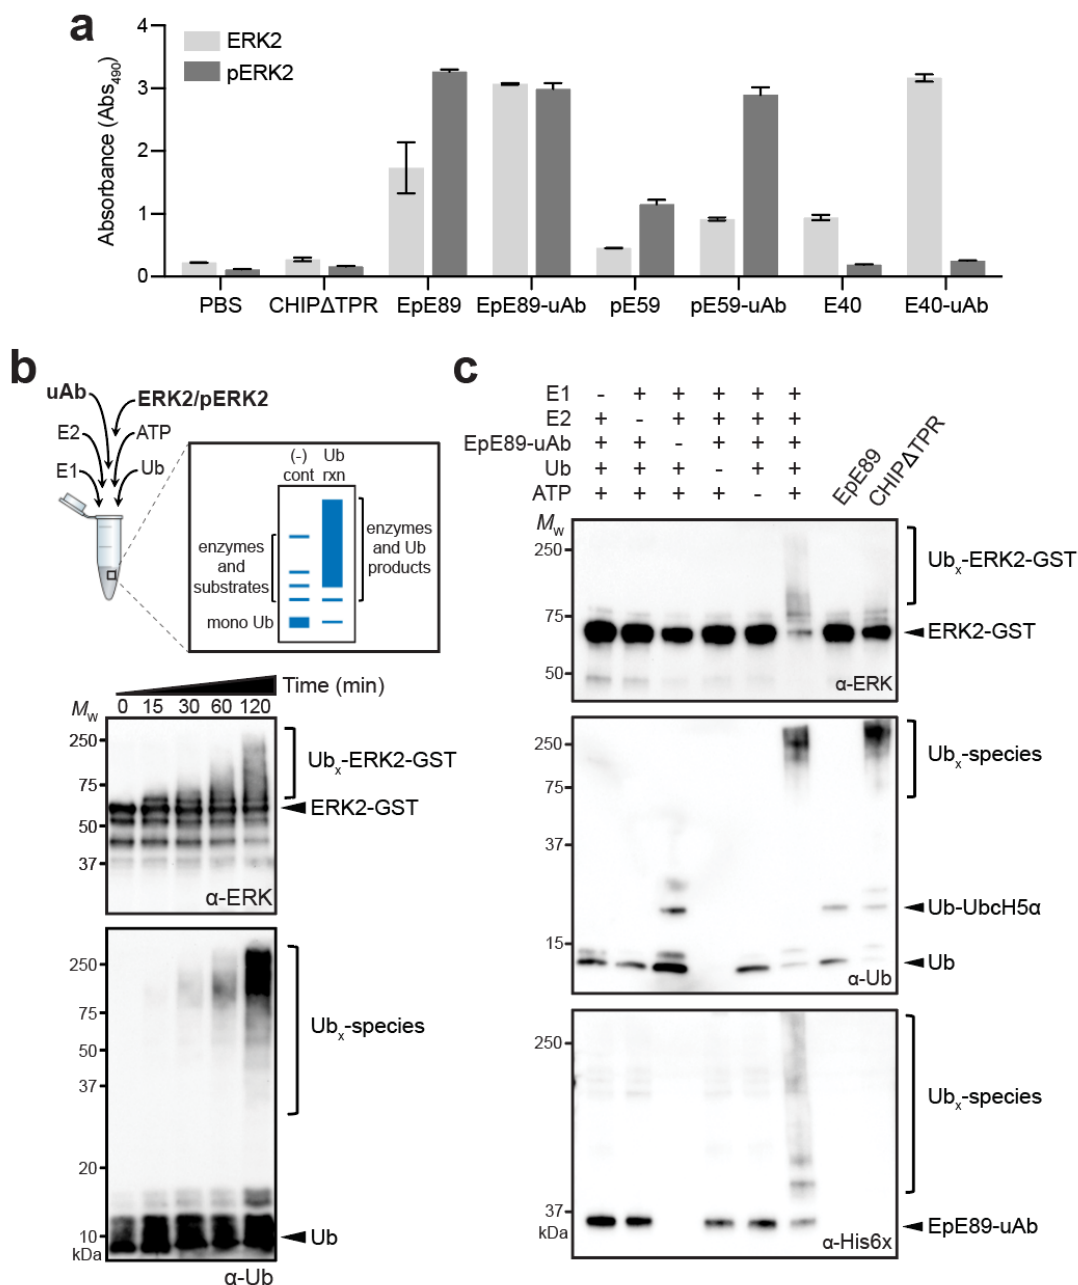

1  
2 **Figure 2. Engineered uAbs bind and ubiquitinate ERK *in vitro*.** (a) ELISA of purified uAbs, DARPin, and CHIPΔTPR against immobilized ERK2 or pERK2 as indicated. Buffer only (PBS) served as a negative control. An equivalent amount of each uAb, DARPin, and CHIPΔTPR protein was used in the assay. Data are average of three biological replicates and error bars represent standard deviation of the mean. (b) *In vitro* ubiquitination of nonphosphorylated ERK2 (ERK2-GST) in the presence of purified EpE89-uAb along with E1, E2, ubiquitin (Ub), and ATP. Samples were collected at indicated times and subjected to immunoblotting. (c) Same as in (b) but all reactions were run for 120 min in presence (+) or absence (-) of each pathway component as indicated. Controls included EpE89 and CHIPΔTPR in presence of all pathway components. For all blots, an equivalent amount of total protein was added to each lane. Immunoblots were probed with: pan-ERK antibody (α-ERK) and anti-ubiquitin (α-Ub) to detect ERK2 and Ub species, respectively; and anti-His6x antibody to detect uAb. Protein bands corresponding to ERK2, Ub, EpE89-uAb, and polyubiquitinated species (Ub<sub>x</sub>) are marked at right. Molecular weight (M<sub>w</sub>) markers are indicated at left. Results are representative of at least three biological replicates.



1 preferring ERK2 but showing a low level of binding to non-cognate pERK2. These results  
2 are consistent with previous findings that the binding affinity between each of these  
3 DARPs and its non-cognate ERK2 or pERK2 form, while significantly weaker than with  
4 the cognate form, were still in the low micromolar range<sup>39</sup>. Importantly, the N-terminally  
5 truncated CHIP $\Delta$ TPR construct, which lacked a substrate-binding domain, showed no  
6 measurable binding activity above background to either ERK2 or pERK2 (**Fig. 2a** and  
7 **Supplementary Fig. 2b**). The enhanced binding measured for the dimeric uAbs relative  
8 to the unfused DARPs is likely due to an avidity effect, as the uAbs are dimers whereas  
9 DARPs are monomeric. Overall, these results indicate that the DARPs successfully  
10 reprogrammed CHIP specificity for distinct ERK forms, with EpE89-uAb showing the  
11 clearest capacity for pan-specific ERK silencing.

12 **Ubiquibodies promote ubiquitin transfer to ERK.** Having demonstrated that EpE89-  
13 uAb possessed pan-specific ERK binding, we next performed *in vitro* ubiquitination  
14 assays with purified UPP components (E1, E2, ubiquitin, and ATP) along with EpE89-  
15 uAb as the E3 enzyme and ERK2 as the target (note that ERK2 has 23 lysine residues in  
16 addition to its N-terminus that serve as potential ubiquitin attachment sites) (**Fig. 2b**).  
17 UbcH5 $\alpha$  was used as the E2 enzyme because it has previously been shown to function  
18 with CHIP *in vitro*<sup>22, 45</sup>. High-molecular-weight (HMW) bands corresponding to  
19 ubiquitinated ERK2 were detected with the pan-ERK antibody, which correlated with the  
20 appearance of HMW ubiquitin species that were detected with the anti-ubiquitin antibody  
21 (**Fig. 2b**). The intensity of the HMW bands became more pronounced at later incubation  
22 times and was characteristic of CHIP-mediated polyubiquitination of its natural and  
23 unnatural targets<sup>22, 45</sup>. Similar ubiquitination results were observed for pE59-uAb and  
24 E40-uAb (**Supplementary Fig. 2c**). Only when all UPP components were included in the  
25 reaction was ubiquitination observed and neither the binding domain, unfused EpE89, nor  
26 the catalytic domain, CHIP $\Delta$ TPR, was capable of producing ubiquitinated ERK2 (**Fig. 2c**).  
27 Collectively, these results confirm that the CHIP $\Delta$ TPR domain retained E3 ligase activity  
28 in the context of the uAb chimeras and was capable of directly transferring ubiquitin to  
29 ERK2.

30 **Ubiquibodies efficiently degrade exogenous and endogenous ERK.** To characterize  
31 the degradation potential of pan-ERK-specific EpE89-uAb, we first evaluated soluble

1 expression in mammalian cells. Specifically, wild-type (wt) HEK293T cells were  
2 transiently transfected with plasmid DNA encoding the chimeric EpE89-uAb construct and  
3 cell lysate was prepared 24 h post-transfection. Strong expression of EpE89-uAb was  
4 detected in soluble lysates by immunoblot analysis using an anti-His6x antibody  
5 (**Supplementary Fig. 3a**). Interestingly, while pE59-uAb also exhibited strong soluble  
6 expression, the E40-uAb construct was barely detectable. To determine whether this poor  
7 expression was somehow related to the cell line, we also expressed the uAbs in MCF7  
8 breast cancer cells and observed an identical expression pattern (**Supplementary Fig.**  
9 **3b**). In light of these poor steady-state levels observed for E40-uAb, we focused our  
10 attention on the EpE89-uAb and pE59-uAb constructs hereafter. It is also worth  
11 mentioning that expression of the three unfused DARPins was barely detectable under  
12 the conditions tested, providing additional evidence for the ability of the CHIP $\Delta$ TPR  
13 domain to enhance soluble expression and revealing an unexpected benefit arising from  
14 uAb chimeragenesis.

15 To investigate intracellular knockdown, we next leveraged an exogenously  
16 expressed ERK2-EGFP reporter fusion. Specifically, a previously engineered cell line that  
17 stably expresses an ERK2-EGFP-encoding transgene (HEK293T<sup>ERK2-EGFP</sup>)<sup>27</sup>, were  
18 transiently transfected with plasmid DNA encoding the uAbs. Immunoblot analysis of  
19 lysate derived from these cells revealed that expression of both EpE89-uAb and pE59-  
20 uAb promoted efficient clearance of ERK2-EGFP relative to the steady-state level  
21 observed in the same cells transfected with an empty plasmid or plasmid DNA encoding  
22 either CHIP $\Delta$ TPR or Off7-uAb (**Supplementary Fig. 3c**). The depletion of ERK2-EGFP  
23 protein levels by EpE89-uAb and pE59-uAb coincided with an overall reduction of GFP  
24 fluorescence as determined by flow cytometric analysis (**Supplementary Fig. 3c**). The  
25 extent of fluorescence reduction associated with ERK2-GFP knockdown was reminiscent  
26 of that observed previously for EGFP-HRAS, EGFP-KRAS, and SHP2-EGFP using uAbs  
27 comprised of synthetic binding proteins against HRAS, KRAS and SHP2, respectively<sup>27</sup>.

28 While the above results demonstrated the feasibility for uAb-mediated knockdown  
29 of an ERK2-containing fusion protein in living cells, we cannot rule out the possibility that  
30 ubiquitin was conjugated exclusively to the EGFP domain and not on ERK1/2, which  
31 would limit the practical utility of EpE89-uAb and pE59-uAb for proteolytic silencing of

1 untagged ERK forms. Interestingly, the pan-specific ERK antibody used to detect ERK2-  
2 EGFP also revealed depletion of endogenous ERK proteins in the lysates derived from  
3 cells expressing EpE89-uAb and pE59-uAb (**Supplementary Fig. 3c**), suggesting that  
4 the uAbs could indeed accelerate the turnover of unmodified ERK in addition to its EGFP-  
5 tagged counterpart. However, even this result was inconclusive as endogenous ERK1  
6 and ERK2 are known to homodimerize <sup>46</sup>, which leaves open the possibility that  
7 endogenous ERK2 could heteroassemble with ubiquitinated ERK2-EGFP (where again  
8 the ubiquitin might be installed on EGFP only) and become targeted for proteolysis via a  
9 piggy-back mechanism.

10 Therefore, we focused our attention on determining the extent to which  
11 endogenously expressed, unmodified ERK could be degraded by EpE89-uAb and pE59-  
12 uAb. To this end, wt HEK293T cells were transiently transfected with the EpE89-uAb and  
13 pE59-uAb-encoding plasmids. After 24 h, transfected cells displayed dramatically  
14 reduced steady-state levels of total ERK1/2 compared to cells receiving empty plasmid  
15 DNA as detected by the phosphorylation-insensitive pan-ERK antibody (**Fig. 3a and b**).  
16 Because cytoplasmic ERK is present as a mixture of nonphosphorylated and  
17 phosphorylated forms in both non-stimulated and stimulated HEK293T cells <sup>39, 47</sup>, we also  
18 probed lysates with an anti-pERK1/2 antibody. Consistent with their strong pERK2  
19 binding activity, both uAbs showed potent reduction of pERK levels that mirrored total  
20 ERK knockdown, with pE59-uAb promoting greater reduction of pERK (**Supplementary**  
21 **Fig. 4**). Importantly, transfection of HEK293T cells with either unfused EpE89, pE59, or  
22 CHIP $\Delta$ TPR resulted in little to no change in total ERK1/2 protein levels, indicating that  
23 none of these domains alone was capable of target depletion and confirming the  
24 importance of the bifunctional uAb design. The non-specific Off7-uAb was also incapable  
25 of promoting ERK1/2 degradation, thereby validating the targeted nature of ERK depletion  
26 by EpE89-uAb and pE59-uAb. As was seen above, soluble expression of the DARPins  
27 was greatly enhanced by fusion to CHIP $\Delta$ TPR. It is also noteworthy that the levels of a  
28 housekeeping protein,  $\beta$ -tubulin, and the native CHIP substrate, Hsp70, were not affected  
29 by expression of EpE89-uAb, pE59-uAb, or any of the other control constructs.

30 We next explored whether our anti-ERK approach would work in other cell  
31 lines. Specifically, we investigated the ability of EpE89-uAb and pE59-uAb to degrade

1 ERK in MCF7 breast cancer cells, which have served as a useful model for studying ERK  
2 expression, activation and signaling<sup>48,49</sup>. Akin to the results with HEK293T, we observed  
3 strong reduction of total ERK1/2 levels in MCF7 cells transfected with plasmid DNA  
4 encoding the EpE89-uAb and pE59-uAb constructs compared to cells transfected with  
5 empty plasmid (**Fig. 3c**). Degradation was most pronounced at 24 h post-transfection;  
6 however, clearly visible depletion of ERK1/2 persisted out to 48 and 72 h  
7 (**Supplementary Fig. 3b**), consistent with the duration of uAb-mediated GFP silencing  
8 observed in our previous work<sup>27</sup>.  
9

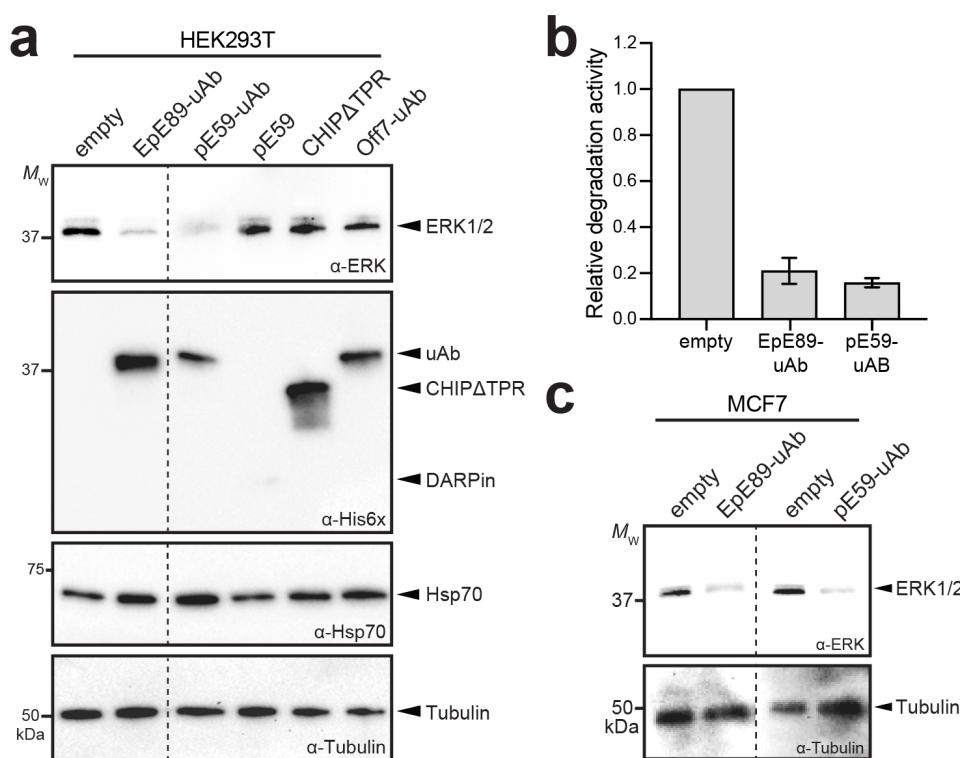

10  
11 **Figure 3. Engineered uAbs efficiently degrade endogenous ERK in living cells.** (a) Immunoblot  
12 analysis of extracts prepared from HEK293T cells transfected with empty pcDNA3 or pcDNA3 encoding  
13 each of the constructs indicated at 0.25 μg plasmid DNA per well. Cells were harvested 24 h post-  
14 transfection, after which extracts were prepared and subjected to immunoblotting. Blots were probed with  
15 the following: pan-ERK antibody (α-ERK) to detect total ERK1/2 expression; polyhistidine antibody (α-  
16 His6x) to detect uAbs, DARPins, and CHIPΔTPR constructs; and Hsp70-specific antibody (α-Hsp70) to  
17 detect native CHIP substrate. Lanes were normalized by total protein content and equivalent loading was  
18 confirmed by probing with β-tubulin (α-Tub). Molecular weight ( $M_w$ ) markers are indicated at left. Results  
19 are representative of at least three biological replicates. (b) Relative quantitation of total ERK1/2 levels by  
20 densitometry analysis of α-ERK immunoblot images using ImageJ Software. Intensity data for uAb bands  
21 was normalized to band intensity for empty plasmid control cases from six independent experiments. Error  
22 bars represent standard deviation of the mean. (c) Immunoblot analysis of extracts prepared from MCF7  
23 cells transfected with empty pcDNA3 or pcDNA3 encoding EpE89-uAb or pE59-uAb at 0.25 μg plasmid  
24 DNA per well. Blots prepared as in (a). Dashed line indicates splicing of the same blot.

1 **Pan-specific uAbs transfer ubiquitin to distinct sites on ERK and pERK.** To further  
2 elucidate the origins of pan-specific degradation, we profiled the ubiquitination patterns  
3 generated by EpE89-uAb and pE59-uAb on nonphosphorylated and phosphorylated  
4 ERK2. Specifically, *in vitro* ubiquitination reactions were performed with each of the uAbs  
5 in the presence of either ERK2 or pERK2 as substrates, after which HMW products (~50-  
6 250 kDa) were separated by SDS-PAGE, excised from the gel, digested with trypsin, and  
7 analyzed by liquid chromatography-tandem mass spectrometry (LC-MS/MS; **Fig. 4a**).  
8 Trypsin digestion of a ubiquitinated protein leaves the C-terminal glycine-glycine residues  
9 of ubiquitin attached to the ubiquitinated lysine residue<sup>50</sup>. Therefore, we searched the  
10 MS data for this modification on ERK2/pERK2 peptides and identified Lys residues to  
11 which ubiquitin was conjugated. In general, the ubiquitination profiles of EpE89-uAb and  
12 pE59-uAb were highly similar, with both uAbs transferring ubiquitin to multiple lysine  
13 residues in ERK2 and pERK2 (**Fig. 4b**). These overlapping profiles help to explain the  
14 observed pan-specific ERK degradation of each uAb. Moreover, both uAbs preferentially  
15 ubiquitinated one face of ERK2/pERK2 (oriented forward in **Fig. 4c**), consisting of the  
16 plane formed by the N- and C-lobes near the active site of ERK2. This face was aligned  
17 with the positioning of the C-terminus of the DARPins with ERK2 as seen in co-crystal  
18 structures<sup>39</sup> and would thus be located in closest proximity to CHIPΔTPR when bound  
19 by the uAb chimera (**Fig. 1b**).

20 Of the 23 total lysines in ERK2, 7 sites (K48, K99, K203, K330, K340, K342, and K344)  
21 were found to be modified in both ERK2 and pERK2 (**Fig. 4b and c**). Only one additional  
22 residue, K259, was ubiquitinated in ERK2 and not pERK2, suggesting that the  
23 conformational change upon phosphorylation may reposition K259 away from the U-box-  
24 bound, ubiquitin-charged E2, Ubch5α. This site was also interesting because it was much  
25 more frequently modified by pE59-uAb than EpE89-uAb in ERK2 and was not modified  
26 by either uAb in pERK2. Four of the modified lysine residues (K99, K340, K342, and  
27 K344) were clustered in the three-dimensional structure of ERK2 (**Fig. 4c**), providing  
28 clues about the orientation of the charged E2-uAb complex relative to the target surface  
29 and consistent with the predicted plane of ubiquitination (**Fig. 1b**). Residues K203 and  
30 K330 were among the most frequently ubiquitinated despite being positioned away from  
31 the plane of ubiquitination, suggesting mobility of the E2-uAb complex as has been

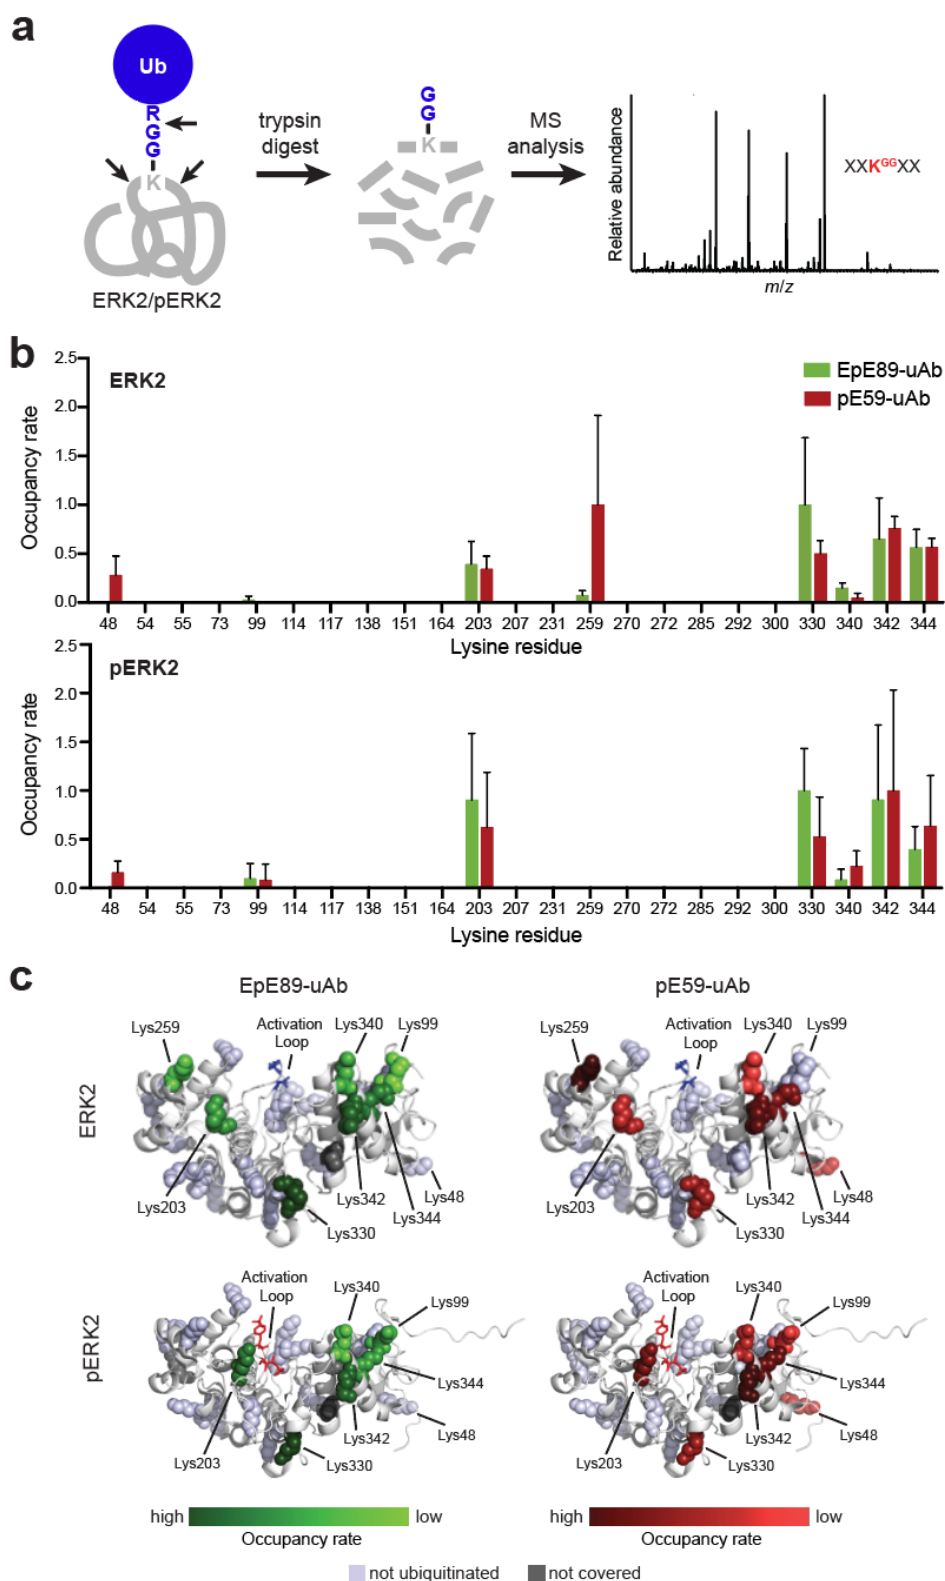

1  
2 **Figure 4. Engineered uAbs install ubiquitin on multiple lysine residues in ERK2 and pERK2.** (a)  
3 Schematic of ubiquitin profiling experiment for revealing precise ubiquitination sites in ERK2/pERK2. Briefly,  
4 mass spectrometry can be used to identify ubiquitin attachment sites based on the characteristic mass shift  
5 caused by the presence of diglycine (GG) that is retained on ubiquitinated lysine residues within peptides

1 after trypsin digestion. (b) Occupancy rate of GG modification of ERK2/pERK2 lysine residues by EpE89-  
2 uAb and pE59-uAb by LC-MS/MS. Peptides corresponding to 80% of the ERK2/pERK2 sequences were  
3 identified using Mascot software. Data were generated by normalizing ubiquitinated residue counts relative  
4 to total residue counts, and by averaging across three independent experiments. Ubiquitinated peptide  
5 counts of peptides containing more than one non-C-terminal lysine residue were averaged over all non-C-  
6 terminal lysines. (c) Mapping of ubiquitination sites on ERK2 and pERK2 where ERK2/pERK2 backbones  
7 are shown as white ribbons and ubiquitinated lysines represented as spheres colored by heat map as  
8 indicated. Lysines not covered by mass spectrometry analysis (dark grey spheres) and lysines not identified  
9 as ubiquitinated (light grey spheres) are also depicted. Structures adapted from PDB ID: 3ZU7 (ERK2) and  
10 PDB ID: 3ZUV (pERK2) of Kummer *et al.*<sup>39</sup> using PyMOL software.  
11

12 observed previously for native E2-E3 complexes<sup>51</sup>. Residue K48 was one of the least  
13 often ubiquitinated sites and the only lysine not on the same face of ERK to be  
14 ubiquitinated. Interestingly, K48 in both ERK2 and pERK2 was modified by EpE89-uAb  
15 but not at all by pE59-uAb, suggesting that the DARPin domains recognize different  
16 epitopes and thus differentially orient the uAbs with respect to ERK2/pERK2 in a manner  
17 that affects how the substrate is ubiquitinated.

18 The polyubiquitin chain topology formed by the uAbs was analyzed using an  
19 identical LC-MS/MS approach (**Supplementary Fig. 5a**), which identified the isopeptide  
20 linkages between the terminal carboxyl group of a free ubiquitin molecule and one of  
21 seven lysine residues present in a substrate-attached ubiquitin. According to this analysis,  
22 both uAbs produced nearly identical ubiquitin chain topologies, preferentially forming K6,  
23 K11, K48, and K63 polyubiquitin linkages in the presence of the E2 Ubch5 $\alpha$   
24 (**Supplementary Fig. 5b**). These same linkages were observed previously on natural and  
25 unnatural substrates that had been ubiquitinated *in vitro* by full-length CHIP and CHIP-  
26 based uAbs, respectively<sup>22, 52</sup>. These results are significant from a targeted degradation  
27 standpoint, as K48 serves as the principal recognition signal for the 26S proteasome and  
28 generally induces substrate degradation<sup>7</sup>, while K6, K11 and K63 have also been  
29 implicated as proteasomal targeting signals<sup>53, 54</sup>. Taken together, these results provide  
30 clear evidence for highly similar ERK2/pERK2 ubiquitination by EpE89-uAb and pE59-  
31 uAb, thereby providing a convenient explanation for their comparable pan-specific ERK  
32 degradation.

33

## 34 Discussion

35 Ubiquibodies are a customizable proteome editing technology for inducing targeted  
36 proteolysis of intracellular proteins and thus hold great potential as both a research tool

1 for dissecting protein networks and as a therapeutic modality with the potential for  
2 inhibiting drug targets that have so far evaded pharmacological intervention. In this study,  
3 we engineered chimeric uAbs comprised of the human E3 ubiquitin ligase CHIP, and  
4 different ERK-specific DARPins that were capable of accelerating the turnover of  
5 exogenous or endogenous ERK protein kinase. In particular, two of the uAbs were shown  
6 to be global ERK degraders, redirecting all ERK1/2 proteoforms, including both active  
7 (doubly phosphorylated) and inactive (nonphosphorylated) conformations, to the 26S  
8 proteasome for degradation in different cell lines including MCF7 breast cancer cells.  
9 These results add to a growing body of evidence that reveals the effectiveness of designer  
10 uAb constructs in promoting the clearance of POIs <sup>22, 26-34</sup> including some that have been  
11 classified as difficult-to-drug.

12 As we demonstrated here and in previous works, the combination of synthetic  
13 binding proteins having affinity and specificity for the POI with the catalytic domain of E3  
14 ligases opens the door to targeted knockout of intracellular proteins and their  
15 posttranslationally modified isoforms. Indeed, numerous structurally diverse POIs that  
16 span a broad range of molecular weights (from 27–179 kDa) and subcellular locations  
17 (i.e., cytoplasm, nucleus, membrane-associated, and transmembrane) have been  
18 targeted for degradation using uAb technology <sup>18-22, 27</sup>. Importantly, design and  
19 construction of uAbs does not require knowledge of the biological function or interaction  
20 partners of the POI. Instead, uAbs take advantage of synthetic binding proteins that have  
21 already been developed or emerge anew such as from systematic, genome-wide efforts  
22 to generate and validate *de novo* protein binders against the human proteome <sup>25</sup>.  
23 Because obtaining antibody mimetics that bind with high specificity and affinity to a target  
24 is generally easier than obtaining small molecules with the same properties, making  
25 custom-designed uAbs from scratch should be more straightforward than generating new  
26 PROTACs <sup>3, 55</sup>.

27 The depletion of total ERK pools obtained with EpE89-uAb was expected given its  
28 affinity for both ERK and pERK; however, the ability of pE59-uAb to also function as a  
29 pan-specific degrader was somewhat surprising given its reported specificity for pERK <sup>39</sup>.  
30 We suspect that despite its clear preference for pERK, pE59-uAb may bind non-cognate  
31 ERK2 with enough affinity to still promote efficient substrate turnover. Indeed, the unfused



1 pE59 DARPIn is known to bind non-cognate ERK2 with micromolar affinity ( $K_D = 3.5\text{--}8.7$   
2  $\mu\text{M}$ <sup>39</sup>), which should be sufficient to promote ubiquitin transfer given that the measured  
3 affinity between CHIP and its native substrates Hsp70, Hsp90, and Hsc70 is also in the  
4 low micromolar range ( $K_D = 0.3\text{--}2.3 \mu\text{M}$ )<sup>56</sup>. Moreover, the binding of ERK2 by pE59-uAb  
5 is likely to be enhanced by avidity effects that arise from dimerization of the CHIP-based  
6 uAb. Importantly, while pan-specific degraders were generated here that promoted  
7 degradation of multiple proteoforms, uAbs have also been created that selectively  
8 degrade distinct forms of a protein<sup>17, 18, 27</sup>. Collectively, the designer binding of uAbs could  
9 open up new avenues for disease intervention by ablating either the entire family of  
10 functionally overlapping proteins or a specific posttranslational event that is preferentially  
11 dysregulated in a diseased state. In the case of ERK, it has been proposed that ERK1/2-  
12 selective inhibitors could provide potential therapeutic opportunities for a broad spectrum  
13 of cancers bearing RAS, RAF, and MEK mutations<sup>36, 57</sup>. Given the functional redundancy  
14 of ERK1 and ERK2, broad inactivation of both family members may be needed to inhibit  
15 cellular proliferation and causes apoptosis in tumor cells and induce significant tumor  
16 regression, a hypothesis that could be investigated using our pan-ERK-specific  
17 degraders. To this end, it should be pointed out that promising *in vivo* results have been  
18 obtained using experimental viral and non-viral vectors to deliver uAb genes<sup>20, 27, 58, 59</sup>,  
19 indicating that clinical translation may not be that far off.

20

## 21 **Material and Methods**

22 **Plasmid construction.** *E. coli* strain DH5 $\alpha$  was used for the construction and propagation  
23 of all plasmids. The creation of plasmids encoding uAb constructs and related controls  
24 were generated following published protocols<sup>34</sup>. Genes encoding each of the DARPins  
25 were PCR amplified from pDST67-based plasmids encoding EpE89, pE59, and E40<sup>39</sup>  
26 using primers that introduced NcoI and EcoRI overhangs. The resulting PCR amplicons  
27 were ligated in plasmid pET28a-R4-uAb<sup>22</sup>, which had been doubly digested with  
28 NcoI/EcoRI to excise the gene encoding scFv13-R4 (R4). This process yielded plasmids  
29 pET28a-EpE89-uAb, pET28a-pE59-uAb, and pET28a-E40-uAb, which encoded each of  
30 the DARPins followed by a flexible GSGSG linker and then CHIP $\Delta$ TPR bearing a tandem  
31 FLAG-His6x sequence at its C-terminus. A similar strategy was used to generate plasmid

1 pET28a-Off7-uAb, where the gene encoding Off7 was PCR amplified from plasmid pRH-  
2 DsbA-off7<sup>60</sup> (kind gift from Mark Ostermeier, Johns Hopkins University). To generate  
3 plasmid pET28a-CHIP $\Delta$ TPR for expression of unfused CHIP $\Delta$ TPR, a gene fragment  
4 corresponding to amino acids 128-303 of human CHIP was PCR amplified with primers  
5 that introduced NcoI and Sall overhangs and ligated into the same sites in plasmid  
6 pET28a-R4-uAb that had been doubly digested with NcoI/Sall to excise the R4-uAb while  
7 leaving behind the tandem FLAG-His6x sequence. To generate plasmids for expression  
8 of unfused DARPins, genes encoding each of the DARPins were similarly PCR amplified  
9 from pDST67-based plasmids using primers that introduced NcoI and HindIII overhangs  
10 as well as an N-terminal RGS-His6x sequence. The resulting PCR amplicons were cloned  
11 into pET28a(+) between NcoI and HindIII, yielding plasmids pET28a-EpE89, pET28a-  
12 pE59, and pET28a-E40. For expression in human cell lines, all uAbs and control proteins  
13 were cloned into plasmid pcDNA3, a mammalian expression vector with constitutive CMV  
14 promoter. This involved PCR amplification of the target genes using the respective  
15 pET28a-based vectors described above as template along with primers that introduced  
16 HindIII and XbaI overhangs and a Kozak sequence at the start codon. The resulting PCR  
17 amplicons were then ligated between the HindIII and XbaI sites in pcDNA3 to yield the  
18 desired plasmids including pcDNA3-EpE89-uAb, pcDNA3-pE59-uAb, and pcDNA3-E40-  
19 uAb. All plasmids were confirmed by DNA sequencing at the Biotechnology Resource  
20 Center (BRC) Genomics Facility at the Cornell Institute of Biotechnology

21 **Protein expression and purification.** All purified uAbs, unfused DARPins, and  
22 CHIP $\Delta$ TPR were obtained from cultures of *E. coli* BL21(DE3) cells carrying pET28a-  
23 based vectors grown in Luria-Bertani (LB) medium. Expression was induced with 0.1 mM  
24 IPTG when the culture density ( $A_{600}$ ) reached 0.6-0.8 and proceeded for 6 hr at 30 °C,  
25 after which cells were harvested by centrifugation at 4,000 $\times$ g for 20 min at 4 °C. The  
26 resulting pellets were stored at -80 °C overnight. Thawed pellets were resuspended in  
27 15 mL phosphate-buffered saline (PBS) supplemented with 10 mM imidazole (pH 7.4)  
28 and lysed with a high-pressure homogenizer (Avestin EmulsiFlex-C5). Lysates were  
29 cleared of insoluble material by centrifugation at 20,000 $\times$ g for 20 min at 4 °C. Clarified  
30 lysates containing His6x-tagged proteins were subjected to gravity-flow Ni<sup>2+</sup>-affinity  
31 purification using HisPur Ni-NTA Resin (ThermoFisher) following manufacturer's

1 protocols. Elution fractions were desalted into PBS buffer (pH 7.4) using PD-10 Desalting  
2 Columns (Cytiva) following manufacturer's protocols. Purified proteins were stored at 4  
3 °C for up to two weeks or diluted to 25% (v/v) glycerol and stored indefinitely at -80 °C.  
4 Final purity of all proteins was confirmed by SDS-polyacrylamide gel electrophoresis  
5 (PAGE) and Coomassie staining. Purity of all proteins was typically >95%.

6 Purified uAbs and CHIPΔTPR were subjected to SEC analysis as described  
7 previously <sup>61</sup>. Standards used to calibrate the SEC column were a lyophilized mix of  
8 thyroglobulin, bovine γ-globulin, chicken ovalbumin, equine myoglobin, and vitamin B12,  
9 MW 1,350–670,000, pI 4.5–6.9 (BioRad). Proteins were stored at a final concentration of  
10 1 mg/mL in SEC buffer (20 mM Tris pH 7.5, 50 mM NaCl, 1 mM EDTA pH 8.0) at 4 °C.

11 To produce biotinylated ERK2 and pERK2 proteins, strain BL21(DE3) was co-  
12 transformed with plasmid pSPI03-BirA-His <sup>62</sup> (kind gift from Amy Karlsson, University of  
13 Maryland) along with either plasmid pLV-ERK2-Avi for expressing nonphosphorylated  
14 ERK2 or pLV-MEK1R4F-ERK2-His-Avi for expressing doubly phosphorylated ERK2,  
15 respectively <sup>39</sup>. These latter plasmids introduced N-terminal Avi tags on ERK2 and pERK2  
16 for biotinylation *in vivo* by the biotin ligase BirA encoded in plasmid pSPI03-BirA-His and  
17 C-terminal His6x tags for affinity purification and immunodetection. Following expression,  
18 bacterial cell pellets were harvested by centrifugation, pelleted, and resuspended in PBS  
19 (pH 7.4) with 1 mM DTT and 0.05% Tween-20. The resulting cell suspensions were  
20 homogenized as above, after which the clarified lysates containing biotinylated ERK2 and  
21 pERK2 were subjected to avidin agarose (ThermoFisher) to purify the Avi-tagged proteins  
22 according to manufacturer's protocols. Following elution with 2 mM biotin, the eluents  
23 were subjected to Ni<sup>2+</sup>-affinity purification as above to remove free biotin and further  
24 enhance the purity. Biotinylated ERK2 and pERK2 were analyzed by SDS-PAGE followed  
25 by Coomassie staining to confirm purity, which was typically >95% for both proteins.

26 **Affinity precipitation.** Affinity purification was performed as described <sup>63</sup>. Briefly, purified  
27 uAbs, unfused DARPins, and CHIPΔTPR were captured on HisPur Ni-NTA Resin  
28 (ThermoFisher) by incubating 300 µg of each protein with 1-mL resin slurry for 30 min at  
29 4 °C with end-over-end rotation. Prepared resin was incubated with 10 µL of lysate at 4  
30 °C overnight. Resin was washed with PBS supplemented with 25 mM imidazole (pH 7.4),  
31 and proteins were eluted with PBS supplemented with 250 mM imidazole (pH7.4).

1 Samples were boiled with 2× Laemmli loading buffer and analyzed by immunoblotting as  
2 described below.

3 **Protein analysis.** Proteins were separated using Precise Tris-HEPES 4–20% SDS-  
4 polyacrylamide gels (ThermoFisher). Coomassie R-250 stain (BioRad) was used to  
5 visualize proteins in SDS-PAGE. Immunoblotting was performed according to standard  
6 protocols. Following transfer of proteins, polyvinylidene fluoride (PVDF) membranes were  
7 probed with the following antibodies at 1/2500 or 1/5000 dilution: rabbit anti-p44/42 MAPK  
8 (ERK1/2) antibody (Cell Signaling, cat # 4695 S) to detect ERK2; rabbit anti-p-p44/42  
9 MAPK (ERK1/2) (Cell Signaling, cat # 9101 S) to detect pERK2; mouse anti-ubiquitin  
10 (Millipore, cat # P4D1-A11) to detect ubiquitin; rabbit anti-Lys27 (Abcam, cat # ab238442)  
11 to detect K27-linked ubiquitin; rabbit anti-Lys48 (Millipore, cat # Apu2) to detect K48-  
12 linked ubiquitin; rabbit anti-Lys63 (Millipore, cat # Apu3) to detect K48-linked ubiquitin;  
13 mouse anti-Hsp70 (Enzo Life Sciences, cat # C92F3A) to detect Hsp70; rabbit anti-β-  
14 tubulin (Cell Signaling Technology, cat # 5346) to detect β-tubulin; rabbit anti-FLAG-HRP  
15 (Abcam, cat # ab49763) to detect uAbs and CHIPΔTPR; and rabbit anti-His6-HRP  
16 (Abcam; cat # ab1187) to detect uAbs, unfused DARPins, and CHIPΔTPR.

17 **ELISA.** To analyze binding to purified ERK and pERK, ELISA analysis was performed as  
18 described previously<sup>39</sup>. Briefly, biotinylated ERK2 and pERK2 (100 nM) were immobilized  
19 on NeutrAvidin-coated 96-well plates (Pierce) overnight at 4 °C and then washed twice  
20 with PBS (pH 7.4) supplemented with 1 mM DTT and 0.05% Tween-20. Next, the plates  
21 were blocked for 1 h with PBS (pH 7.4) supplemented with 1 mM DTT, 0.05% Tween-20,  
22 and 1% (w/v) BSA. All subsequent ELISA steps were performed at 4 °C in PBS (pH 7.4)  
23 with 1 mM DTT and 0.05% Tween-20. To measure binding activity, varying  
24 concentrations of purified uAbs, unfused DARPins, or CHIPΔTPR were applied wells with  
25 or without ERK2 or pERK2 for 1 h. Following three washes, binding activity was detected  
26 by rabbit anti-His6-HRP (Abcam; cat # ab1187) or mouse anti-RGS-His antibody (Qiagen;  
27 cat # 34610) at 1:5000 dilution followed by goat anti-rabbit-HRP conjugate (Abcam;  
28 ab6789) at 1:2500 dilution. After 1 h of incubation at room temperature, plates were  
29 washed and then incubated with SigmaFast OPD HRP substrate (Sigma) for 30 min in  
30 the dark. The reaction was quenched with 3 M H<sub>2</sub>SO<sub>4</sub> and the absorbance of the wells  
31 measured at 492 nm.

1 **Ubiquitination assays.** Ubiquitination assays were performed as previously described  
2 <sup>45</sup> in the presence of 0.1  $\mu$ M purified human UBE1 (Boston Biochem), 4  $\mu$ M human  
3 UbcH5 $\alpha$ /UBE2D1 (Boston Biochem), 3  $\mu$ M uAb (or equivalent control protein), 1.5  $\mu$ M  
4 human ERK2 or phosphoERK2 (ProQinase), 50  $\mu$ M human ubiquitin (Boston Biochem),  
5 4 mM ATP and 1 mM DTT in 20 mM MOPs, 100 mM KCl, 5 mM MgCl<sub>2</sub>, pH 7.2. Reactions  
6 were carried out at 37 °C for 2 h (unless otherwise noted) and stopped by boiling in 2 $\times$   
7 Laemmli loading buffer for analysis by immunoblotting.

8 **Flow cytometric analysis.** Cells were passed into 12-well plates at 10,000 cells/cm<sup>2</sup>. At  
9 16–24 h after seeding, cells were transiently transfected as described above. Culture  
10 media was replaced 4–6 h post-transfection. Then, 24 h post-transfection, cells were  
11 harvested and resuspended in PBS for analysis using a FACSCalibur (BD Biosciences).  
12 FlowJo software (Version 10) was used to analyze samples by geometric mean  
13 fluorescence determined from 10,000 events.

14 **Cell culture, transfection, and lysate preparation.** HEK293T and MCF7 cell lines were  
15 obtained from ATCC, while the HEK293T<sup>ERK2-EGFP</sup> cell line was previously generated in-  
16 house <sup>27</sup>. HEK293T and HEK293T<sup>ERK2-EGFP</sup> cells were cultured in DMEM media  
17 supplemented with high glucose and L-glutamine (VWR) supplemented with 10%  
18 Hyclone FetalClone I serum (VWR) and 1% penicillin-streptomycin-amphotericin B  
19 (ThermoFisher). MCF7 cells were cultured similarly but insulin (10 mg/mL, Sigma) was  
20 added to the media. All cells were maintained at 37 °C, 5% CO<sub>2</sub> and 90% relative humidity  
21 (RH). Additionally, all cell lines were maintained at low passage numbers and routinely  
22 checked for *Mycoplasma* by PCR according to standard procedures. Cells were  
23 transfected in 6-well dishes at 60-80% confluency with 2  $\mu$ g total plasmid DNA using  
24 empty pcDNA3 plasmid to balance all transfections. Transfection was performed using  
25 jetPRIME<sup>®</sup> (Polyplus Transfection) according to manufacturer's instructions with a 1:2  
26 ratio (w/v) of jetPRIME<sup>®</sup> to DNA with growth media refreshed at 4 h post-transfection. At  
27 24 h post-transfection, cell lysate was prepared by harvesting cells in PBS, pelleting at  
28 8000 $\times$ g for 5 min at 4 °C, and freezing at –20 °C until analyzed by immunoblotting.  
29 Thawed pellets were lysed in NP40 lysis buffer (150 mM NaCl, 1% Nonidet P-40, 50 mM  
30 Tris-HCl, pH 7.4) by pipetting and mixing for 30 min at 4 °C. Soluble fractions were

1 obtained by centrifugation of lysed cells at 18,000×g for 20 min at 4 °C. Samples were  
2 boiled in 2× Laemmli sample buffer for analysis by immunoblotting.

3 **Mass spectrometry analysis.** For LC-MS/MS sample preparation, ubiquitination assays  
4 were performed as described above. Reactions were resolved by SDS-PAGE and stained  
5 by Coomassie R250 prior to gel excision. The protein bands were excised from an SDS-  
6 PAGE gel, cut into ~1-mm<sup>3</sup> cubes, and submitted to the Biotechnology Resource Center  
7 (BRC) Proteomics and Metabolomics Facility at the Cornell Institute of Biotechnology for  
8 further analysis. Specifically, the gel bands were washed in 200 µL of deionized water for  
9 5 min, followed by 200 µL of 100 mM ammonium bicarbonate/acetonitrile (1:1) for 10 min,  
10 and finally 200 µL of acetonitrile for 5 min. The acetonitrile was discarded, and the gel  
11 bands were dried in a speed-vac for 10 min. The gel pieces were rehydrated with 70 µL  
12 of 10 mM DTT in 100 mM ammonium bicarbonate and incubated for 1 h at 56 °C. The  
13 samples were allowed to cool to room temperature, after which 100 µL of 55 mM  
14 iodoacetamide in 100 mM ammonium bicarbonate was added and the samples were  
15 incubated at room temperature in the dark for 60 min. Following incubation, the gel slices  
16 were again washed as described above. The gel slices were dried and rehydrated with  
17 50 µL of trypsin at 50 ng/µL in 45 mM ammonium bicarbonate and 10% acetonitrile on  
18 ice for 30 min. The gel pieces were covered with an additional 25 µL of 45 mM ammonium  
19 bicarbonate and 10% acetonitrile, and incubated at 37 °C for 19 h. The digested peptides  
20 were extracted twice with 70 µL of 50% acetonitrile, 5% formic acid (vortexed 30 min and  
21 sonicated 10 min) and once with 70 µL of 90% acetonitrile, 5% formic acid. Extracts from  
22 each sample were combined and lyophilized.

23 The lyophilized in-gel tryptic digest samples were reconstituted in 20 µL of  
24 nanopure water with 0.5% formic acid for nanoLC-ESI-MS/MS analysis, which was  
25 carried out by a LTQOrbitrap Velos mass spectrometer (ThermoFisher) equipped with a  
26 CorConneX nano ion source device (CorSolutions LLC). The Orbitrap was interfaced with  
27 a nano HPLC carried out by an UltiMate3000 UPLC system (Dionex). The gel extracted  
28 peptide samples (2–4 µL) were injected onto a PepMap C18 trap column-nano Viper (5  
29 µm, 100 µm × 2 cm, Thermo Dionex) at 20 µL/min flow rate for online desalting and then  
30 separated on a PepMap C18 RP nanocolumn (3 µm, 75 µm × 15 cm, Thermo Dionex)  
31 which was installed in the “Plug and Play” device with a 10-µm spray emitter

1 (NewObjective). The peptides were then eluted with a 90-min gradient of 5% to 38%  
2 acetonitrile in 0.1% formic acid at a flow rate of 300 nl/min. The Orbitrap Velos was  
3 operated in positive ion mode with nanospray voltage set at 1.5 kV and source  
4 temperature at 275 °C. Internal calibration was performed with the background ion signal  
5 at  $m/z$  445.120025 as the lock mass. The instrument was operated in parallel data-  
6 dependent acquisition mode using FT mass analyzer for one survey MS scan for  
7 precursor ions followed by MS/MS scans on top 7 highest intensity peaks with multiple  
8 charged ions above a threshold ion count of 7,500 in both LTQ mass analyzer and high-  
9 energy collision dissociation (HCD)-based FT mass analyzer at 7,500 resolution.  
10 Dynamic exclusion parameters were set at repeat count 1 with a 15-s repeat duration,  
11 exclusion list size of 500, 30-s exclusion duration, and  $\pm 10$  ppm exclusion mass width.  
12 HCD parameters were set at the following values: isolation width of 2.0  $m/z$ , normalized  
13 collision energy of 35%, activation  $Q$  at 0.25, and activation time of 0.1 ms. All data were  
14 acquired using Xcalibur operation software (version 2.1, ThermoFisher).

15 All MS and MS/MS raw spectra were processed and searched using Proteome  
16 Discoverer 1.3 (PD1.3; ThermoFisher) against databases downloaded from the NCBI  
17 database. The database search was performed with two-missed cleavage site by trypsin  
18 allowed. The peptide tolerance was set to 10 ppm, and MS/MS tolerance was set to 0.8  
19 Da for collision-induced dissociation and 0.05 Da for HCD. A fixed carbamidomethyl  
20 modification of cysteine, variable modifications on methionine oxidation, and ubiquitin  
21 modification of lysine were set. The peptides with low confidence score (with an Xcorr  
22 score  $< 2$  for doubly charged ion and  $< 2.7$  for triply charged ion) defined by PD1.3 were  
23 filtered out, and the remaining peptides were considered for the peptide identification with  
24 possible ubiquitination determinations. All MS/MS spectra for possibly identified  
25 ubiquitination peptides from initial database searching were manually inspected and  
26 validated using both PD1.3 and Xcalibur (version 2.1) software.

27  
28 **Data availability.** All data generated or analyzed during this study are included in this  
29 article (and its supplementary information) or are available from the corresponding  
30 authors on reasonable request.

31

1 **Acknowledgements.** We thank Dr. Cam Patterson, Dr. Mark Ostermeier, Dr. Amy  
2 Karlsson, and Dr. Melanie Cobb for plasmids used in this study. We also thank Dr. Peter  
3 Schweitzer and the BRC Genomics Facility at the Cornell Institute of Biotechnology for  
4 sequencing experiments and Sheng Zhang and the Proteomics and Metabolomics  
5 Facility of the Biotechnology Resource Center of Cornell Institute of Biotechnology for  
6 help with mass spectrometry experiments. This work was supported by the National  
7 Science Foundation Grant CBET-1605242 (to M.P.D.), the National Institutes of Health  
8 Grant Numbers R21CA132223 and R01GM137314 (to M.P.D.), the Defense Threat  
9 Reduction Agency HDTRA1-20-10004 (to M.P.D.), the New York State Office of Science,  
10 Technology and Academic Research Distinguished Faculty Award (to M.P.D.), and the  
11 Cornell Technology Acceleration and Maturation (CTAM) Fund. The work was also  
12 supported by seed project funding (to M.P.D.) through the National Institutes of Health-  
13 funded Cornell Center on the Physics of Cancer Metabolism (supporting  
14 grant 1U54CA210184-01). The content is solely the responsibility of the authors and does  
15 not necessarily represent the official views of the National Cancer Institute or the National  
16 Institutes of Health. E.A.S. and M.B.L. were each supported by National Science  
17 Foundation Graduate Research Fellowships (grants DGE-1650441 and DGE-1144153,  
18 respectively) and Cornell Presidential Life Science Fellowships. M.B.L. was also  
19 supported by a Cornell Fleming Graduate Scholarship. B.M. was supported by a Royal  
20 Thai Government Fellowship.

21  
22 **Author Contributions.** E.A.S. designed research, performed all research, analyzed all  
23 data and wrote the paper. M.B.L., B.M., M.L., and K.J.F. performed research. T.Y. and  
24 C.M. helped write and edit the paper. L.K., and A.P. aided in data interpretation. M.P.D.  
25 directed research, analyzed data and wrote the paper.

26  
27 **Competing Interests.** M.P.D. has a financial interest in UbiquiTx, Inc. M.P.D.'s interests  
28 are reviewed and managed by Cornell University in accordance with their conflict of  
29 interest policies. All other authors declare no competing interests.

30  
31



## 1 References

- 2 1. Lai, A. C.; Crews, C. M., Induced protein degradation: an emerging drug discovery  
3 paradigm. *Nat Rev Drug Discov* **2017**, *16* (2), 101-114.
- 4 2. Chen, R. P.; Gaynor, A. S.; Chen, W., Synthetic biology approaches for targeted  
5 protein degradation. *Biotechnol Adv* **2019**, *37* (8), 107446.
- 6 3. Lopez-Barbosa, N.; Ludwicki, M. B.; DeLisa, M. P., Proteome editing using  
7 engineered proteins that hijack cellular quality control machinery. *AIChE J* **2020**, *66*,  
8 e16854.
- 9 4. Crews, C. M., Targeting the undruggable proteome: the small molecules of my  
10 dreams. *Chem Biol* **2010**, *17* (6), 551-5.
- 11 5. Arkin, M. R.; Wells, J. A., Small-molecule inhibitors of protein-protein interactions:  
12 progressing towards the dream. *Nat Rev Drug Discov* **2004**, *3* (4), 301-17.
- 13 6. Ciechanover, A., The ubiquitin-proteasome pathway: on protein death and cell life.  
14 *EMBO J* **1998**, *17* (24), 7151-60.
- 15 7. Pickart, C. M., Targeting of substrates to the 26S proteasome. *FASEB J* **1997**, *11*  
16 (13), 1055-66.
- 17 8. Neklesa, T. K.; Winkler, J. D.; Crews, C. M., Targeted protein degradation by  
18 PROTACs. *Pharmacol Ther* **2017**, *174*, 138-144.
- 19 9. Deshaies, R. J., Protein degradation: Prime time for PROTACs. *Nat Chem Biol* **2015**,  
20 *11* (9), 634-5.
- 21 10. Schneekloth, J. S., Jr.; Fonseca, F. N.; Koldobskiy, M.; Mandal, A.; Deshaies, R.;  
22 Sakamoto, K.; Crews, C. M., Chemical genetic control of protein levels: selective in  
23 vivo targeted degradation. *J Am Chem Soc* **2004**, *126* (12), 3748-54.
- 24 11. Hines, J.; Gough, J. D.; Corson, T. W.; Crews, C. M., Posttranslational protein  
25 knockdown coupled to receptor tyrosine kinase activation with phosphoPROTACs.  
26 *Proc Natl Acad Sci U S A* **2013**, *110* (22), 8942-7.
- 27 12. Schneekloth, A. R.; Pucheault, M.; Tae, H. S.; Crews, C. M., Targeted intracellular  
28 protein degradation induced by a small molecule: En route to chemical proteomics.  
29 *Bioorg Med Chem Lett* **2008**, *18* (22), 5904-8.
- 30 13. Bondeson, D. P.; Mares, A.; Smith, I. E.; Ko, E.; Campos, S.; Miah, A. H.;  
31 Mulholland, K. E.; Routly, N.; Buckley, D. L.; Gustafson, J. L.; Zinn, N.; Grandi, P.;  
32 Shimamura, S.; Bergamini, G.; Faelth-Savitski, M.; Bantscheff, M.; Cox, C.;  
33 Gordon, D. A.; Willard, R. R.; Flanagan, J. J.; Casillas, L. N.; Votta, B. J.; den  
34 Besten, W.; Famm, K.; Kruidenier, L.; Carter, P. S.; Harling, J. D.; Churcher, I.;  
35 Crews, C. M., Catalytic in vivo protein knockdown by small-molecule PROTACs. *Nat*  
36 *Chem Biol* **2015**, *11* (8), 611-7.
- 37 14. Sakamoto, K. M.; Kim, K. B.; Kumagai, A.; Mercurio, F.; Crews, C. M.; Deshaies,  
38 R. J., Protacs: chimeric molecules that target proteins to the Skp1-Cullin-F box  
39 complex for ubiquitination and degradation. *Proc Natl Acad Sci U S A* **2001**, *98* (15),  
40 8554-9.
- 41 15. Mullard, A., First targeted protein degrader hits the clinic. *Nat Rev Drug Discov* **2019**.
- 42 16. Zhou, P.; Bogacki, R.; McReynolds, L.; Howley, P. M., Harnessing the ubiquitination  
43 machinery to target the degradation of specific cellular proteins. *Mol Cell* **2000**, *6* (3),  
44 751-6.
- 45 17. Zhang, J.; Zheng, N.; Zhou, P., Exploring the functional complexity of cellular  
46 proteins by protein knockout. *Proc Natl Acad Sci U S A* **2003**, *100* (24), 14127-32.

- 1 18. Kong, F.; Zhang, J.; Li, Y.; Hao, X.; Ren, X.; Li, H.; Zhou, P., Engineering a single  
2 ubiquitin ligase for the selective degradation of all activated ErbB receptor tyrosine  
3 kinases. *Oncogene* **2014**, *33* (8), 986-95.
- 4 19. Ma, Y.; Gu, Y.; Zhang, Q.; Han, Y.; Yu, S.; Lu, Z.; Chen, J., Targeted degradation  
5 of KRAS by an engineered ubiquitin ligase suppresses pancreatic cancer cell growth  
6 in vitro and in vivo. *Mol Cancer Ther* **2013**, *12* (3), 286-94.
- 7 20. Sufan, R. I.; Moriyama, E. H.; Mariampillai, A.; Roche, O.; Evans, A. J.; Alajez, N.  
8 M.; Vitkin, I. A.; Yang, V. X.; Liu, F. F.; Wilson, B. C.; Ohh, M., Oxygen-independent  
9 degradation of HIF-alpha via bioengineered VHL tumour suppressor complex. *EMBO*  
10 *Mol Med* **2009**, *1* (1), 66-78.
- 11 21. Hatakeyama, S.; Watanabe, M.; Fujii, Y.; Nakayama, K. I., Targeted destruction of  
12 c-Myc by an engineered ubiquitin ligase suppresses cell transformation and tumor  
13 formation. *Cancer Res* **2005**, *65* (17), 7874-9.
- 14 22. Portnoff, A. D.; Stephens, E. A.; Varner, J. D.; DeLisa, M. P., Ubiquibodies, synthetic  
15 E3 ubiquitin ligases endowed with unnatural substrate specificity for targeted protein  
16 silencing. *J Biol Chem* **2014**, *289* (11), 7844-55.
- 17 23. Sheehan, J.; Marasco, W. A., Phage and yeast display. *Microbiol Spectr* **2015**, *3* (1),  
18 AID-0028-2014.
- 19 24. Dreier, B.; Plückthun, A., Rapid selection of high-affinity binders using ribosome  
20 display. *Methods Mol Biol* **2012**, *805*, 261-86.
- 21 25. Colwill, K.; Renewable Protein Binder Working, G.; Graslund, S., A roadmap to  
22 generate renewable protein binders to the human proteome. *Nat Methods* **2011**, *8*  
23 (7), 551-8.
- 24 26. Caussin, E.; Kanca, O.; Affolter, M., Fluorescent fusion protein knockout mediated  
25 by anti-GFP nanobody. *Nat Struct Mol Biol* **2011**, *19* (1), 117-21.
- 26 27. Ludwicki, M. B.; Li, J.; Stephens, E. A.; Roberts, R. W.; Koide, S.; Hammond, P.  
27 T.; DeLisa, M. P., Broad-spectrum proteome editing with an engineered bacterial  
28 ubiquitin ligase mimic. *ACS Cent Sci* **2019**, *5* (5), 852-866.
- 29 28. Fulcher, L. J.; Hutchinson, L. D.; Macartney, T. J.; Turnbull, C.; Sapkota, G. P.,  
30 Targeting endogenous proteins for degradation through the affinity-directed protein  
31 missile system. *Open Biol* **2017**, *7* (5).
- 32 29. Fulcher, L. J.; Macartney, T.; Bozatz, P.; Hornberger, A.; Rojas-Fernandez, A.;  
33 Sapkota, G. P., An affinity-directed protein missile system for targeted proteolysis.  
34 *Open Biol* **2016**, *6* (10).
- 35 30. Shin, Y. J.; Park, S. K.; Jung, Y. J.; Kim, Y. N.; Kim, K. S.; Park, O. K.; Kwon, S.  
36 H.; Jeon, S. H.; Trinh, A.; Fraser, S. E.; Kee, Y.; Hwang, B. J., Nanobody-  
37 targeted E3-ubiquitin ligase complex degrades nuclear proteins. *Sci Rep* **2015**, *5*,  
38 14269.
- 39 31. Lim, S.; Khoo, R.; Peh, K. M.; Teo, J.; Chang, S. C.; Ng, S.; Beilhartz, G. L.;  
40 Melnyk, R. A.; Johannes, C. W.; Brown, C. J.; Lane, D. P.; Henry, B.; Partridge, A.  
41 W., bioPROTACs as versatile modulators of intracellular therapeutic targets including  
42 proliferating cell nuclear antigen (PCNA). *Proc Natl Acad Sci U S A* **2020**, *117* (11),  
43 5791-5800.
- 44 32. Roth, S.; Macartney, T. J.; Konopacka, A.; Chan, K. H.; Zhou, H.; Queisser, M. A.;  
45 Sapkota, G. P., Targeting endogenous K-RAS for degradation through the affinity-  
46 directed protein missile system. *Cell Chem Biol* **2020**, *27* (9), 1151-1163 e6.

- 1 33. Chatterjee, P.; Ponnampati, M.; Kramme, C.; Plesa, A. M.; Church, G. M.; Jacobson,  
2 J. M., Targeted intracellular degradation of SARS-CoV-2 via computationally  
3 optimized peptide fusions. *Commun Biol* **2020**, *3* (1), 715.
- 4 34. Baltz, M. R.; Stephens, E. A.; DeLisa, M. P., Design and functional characterization  
5 of synthetic E3 ubiquitin ligases for targeted protein depletion. *Curr Protoc Chem Biol*  
6 **2018**, *10* (1), 72-90.
- 7 35. Busca, R.; Pouyssegur, J.; Lenormand, P., ERK1 and ERK2 Map Kinases: Specific  
8 Roles or Functional Redundancy? *Front Cell Dev Biol* **2016**, *4*, 53.
- 9 36. Samatar, A. A.; Poulidakos, P. I., Targeting RAS-ERK signalling in cancer: promises  
10 and challenges. *Nat Rev Drug Discov* **2014**, *13* (12), 928-42.
- 11 37. Chambard, J. C.; Lefloch, R.; Pouyssegur, J.; Lenormand, P., ERK implication in  
12 cell cycle regulation. *Biochim Biophys Acta* **2007**, *1773* (8), 1299-310.
- 13 38. Yoon, S.; Seger, R., The extracellular signal-regulated kinase: multiple substrates  
14 regulate diverse cellular functions. *Growth Factors* **2006**, *24* (1), 21-44.
- 15 39. Kummer, L.; Parizek, P.; Rube, P.; Millgramm, B.; Prinz, A.; Mittl, P. R.; Kauffholz,  
16 M.; Zimmermann, B.; Herberg, F. W.; Plückthun, A., Structural and functional  
17 analysis of phosphorylation-specific binders of the kinase ERK from designed ankyrin  
18 repeat protein libraries. *Proc Natl Acad Sci U S A* **2012**, *109* (34), E2248-57.
- 19 40. Zhang, M.; Windheim, M.; Roe, S. M.; Peggie, M.; Cohen, P.; Prodromou, C.;  
20 Pearl, L. H., Chaperoned ubiquitylation--crystal structures of the CHIP U box E3  
21 ubiquitin ligase and a CHIP-Ubc13-Uev1a complex. *Mol Cell* **2005**, *20* (4), 525-38.
- 22 41. Xu, Z.; Devlin, K. I.; Ford, M. G.; Nix, J. C.; Qin, J.; Misra, S., Structure and  
23 interactions of the helical and U-box domains of CHIP, the C terminus of HSP70  
24 interacting protein. *Biochemistry* **2006**, *45* (15), 4749-59.
- 25 42. Connell, P.; Ballinger, C. A.; Jiang, J.; Wu, Y.; Thompson, L. J.; Hohfeld, J.;  
26 Patterson, C., The co-chaperone CHIP regulates protein triage decisions mediated  
27 by heat-shock proteins. *Nat Cell Biol* **2001**, *3* (1), 93-6.
- 28 43. Binz, H. K.; Amstutz, P.; Plückthun, A., Engineering novel binding proteins from  
29 nonimmunoglobulin domains. *Nat Biotechnol* **2005**, *23* (10), 1257-68.
- 30 44. Meksiriporn, B.; Ludwicki, M. B.; Stephens, E. A.; Jiang, A.; Lee, H. C.; Waraho-  
31 Zhmayev, D.; Kummer, L.; Brandl, F.; Plückthun, A.; DeLisa, M. P., A survival  
32 selection strategy for engineering synthetic binding proteins that specifically  
33 recognize post-translationally phosphorylated proteins. *Nat Commun* **2019**, *10* (1),  
34 1830.
- 35 45. Qian, S. B.; Waldron, L.; Choudhary, N.; Klevit, R. E.; Chazin, W. J.; Patterson, C.,  
36 Engineering a ubiquitin ligase reveals conformational flexibility required for ubiquitin  
37 transfer. *J Biol Chem* **2009**, *284* (39), 26797-802.
- 38 46. Khokhlatchev, A. V.; Canagarajah, B.; Wilsbacher, J.; Robinson, M.; Atkinson, M.;  
39 Goldsmith, E.; Cobb, M. H., Phosphorylation of the MAP kinase ERK2 promotes its  
40 homodimerization and nuclear translocation. *Cell* **1998**, *93* (4), 605-15.
- 41 47. Pirkmajer, S.; Chibalin, A. V., Serum starvation: caveat emptor. *Am J Physiol Cell*  
42 *Physiol* **2011**, *301* (2), C272-9.
- 43 48. Herrero, A.; Casar, B.; Colon-Bolea, P.; Agudo-Ibanez, L.; Crespo, P., Defined  
44 spatiotemporal features of RAS-ERK signals dictate cell fate in MCF-7 mammary  
45 epithelial cells. *Mol Biol Cell* **2016**, *27* (12), 1958-68.

- 1 49. Giani, C.; Casalini, P.; Pupa, S. M.; De Vecchi, R.; Ardini, E.; Colnaghi, M. I.;  
2 Giordano, A.; Menard, S., Increased expression of c-erbB-2 in hormone-dependent  
3 breast cancer cells inhibits cell growth and induces differentiation. *Oncogene* **1998**,  
4 *17* (4), 425-32.
- 5 50. Peng, J.; Schwartz, D.; Elias, J. E.; Thoreen, C. C.; Cheng, D.; Marsischky, G.;  
6 Roelofs, J.; Finley, D.; Gygi, S. P., A proteomics approach to understanding protein  
7 ubiquitination. *Nat Biotechnol* **2003**, *21* (8), 921-6.
- 8 51. Dye, B. T.; Schulman, B. A., Structural mechanisms underlying posttranslational  
9 modification by ubiquitin-like proteins. *Annu Rev Biophys Biomol Struct* **2007**, *36*,  
10 131-50.
- 11 52. Kundrat, L.; Regan, L., Identification of residues on Hsp70 and Hsp90 ubiquitinated  
12 by the cochaperone CHIP. *J Mol Biol* **2010**, *395* (3), 587-94.
- 13 53. Xu, P.; Duong, D. M.; Seyfried, N. T.; Cheng, D.; Xie, Y.; Robert, J.; Rush, J.;  
14 Hochstrasser, M.; Finley, D.; Peng, J., Quantitative proteomics reveals the function  
15 of unconventional ubiquitin chains in proteasomal degradation. *Cell* **2009**, *137* (1),  
16 133-45.
- 17 54. Saeki, Y.; Kudo, T.; Sone, T.; Kikuchi, Y.; Yokosawa, H.; Toh-e, A.; Tanaka, K.,  
18 Lysine 63-linked polyubiquitin chain may serve as a targeting signal for the 26S  
19 proteasome. *EMBO J* **2009**, *28* (4), 359-71.
- 20 55. Osherovich, L., Degradation from within. *SciBX* **2014**, *7*, 10-11.
- 21 56. Stankiewicz, M.; Nikolay, R.; Rybin, V.; Mayer, M. P., CHIP participates in protein  
22 triage decisions by preferentially ubiquitinating Hsp70-bound substrates. *FEBS J*  
23 **2010**, *277* (16), 3353-67.
- 24 57. Liu, F.; Yang, X.; Geng, M.; Huang, M., Targeting ERK, an Achilles' Heel of the  
25 MAPK pathway, in cancer therapy. *Acta Pharm Sin B* **2018**, *8* (4), 552-562.
- 26 58. Chen, W.; Lee, J.; Cho, S. Y.; Fine, H. A., Proteasome-mediated destruction of the  
27 cyclin a/cyclin-dependent kinase 2 complex suppresses tumor cell growth in vitro and  
28 in vivo. *Cancer Res* **2004**, *64* (11), 3949-57.
- 29 59. Cohen, J. C.; Scott, D. K.; Miller, J.; Zhang, J.; Zhou, P.; Larson, J. E., Transient  
30 in utero knockout (TIUKO) of C-MYC affects late lung and intestinal development in  
31 the mouse. *BMC Dev Biol* **2004**, *4*, 4.
- 32 60. Nicholes, N.; Date, A.; Beaujean, P.; Hauk, P.; Kanwar, M.; Ostermeier, M.,  
33 Modular protein switches derived from antibody mimetic proteins. *Protein Eng Des*  
34 *Sel* **2016**, *29* (2), 77-85.
- 35 61. Mizrachi, D.; Chen, Y.; Liu, J.; Peng, H. M.; Ke, A.; Pollack, L.; Turner, R. J.;  
36 Auchus, R. J.; DeLisa, M. P., Making water-soluble integral membrane proteins in  
37 vivo using an amphipathic protein fusion strategy. *Nat Commun* **2015**, *6*, 6826.
- 38 62. Ikonomova, S. P.; He, Z.; Karlsson, A. J., A simple and robust approach to  
39 immobilization of antibody fragments. *J Immunol Methods* **2016**, *435*, 7-16.
- 40 63. Amstutz, P.; Koch, H.; Binz, H. K.; Deuber, S. A.; Plückthun, A., Rapid selection of  
41 specific MAP kinase-binders from designed ankyrin repeat protein libraries. *Protein*  
42 *Eng Des Sel* **2006**, *19* (5), 219-29.
- 43
